# Supplementary material for: Antigravitropic PIN polarization maintains non-vertical growth in lateral roots
Source: PubMed Central journal article supplement (PMC10505559; doi:10.1038/s41477-023-01478-x), 2023-09-04
Supplement: 41477_2023_1478_MOESM2_ESM.pdf [file 41477_2023_1478_MOESM2_ESM.pdf]

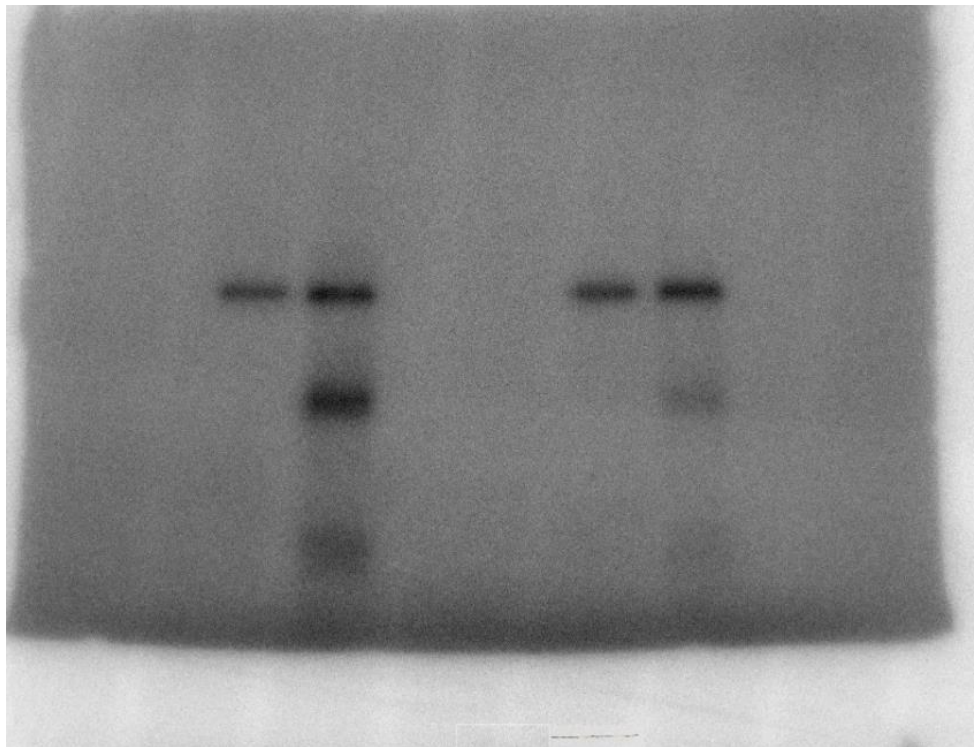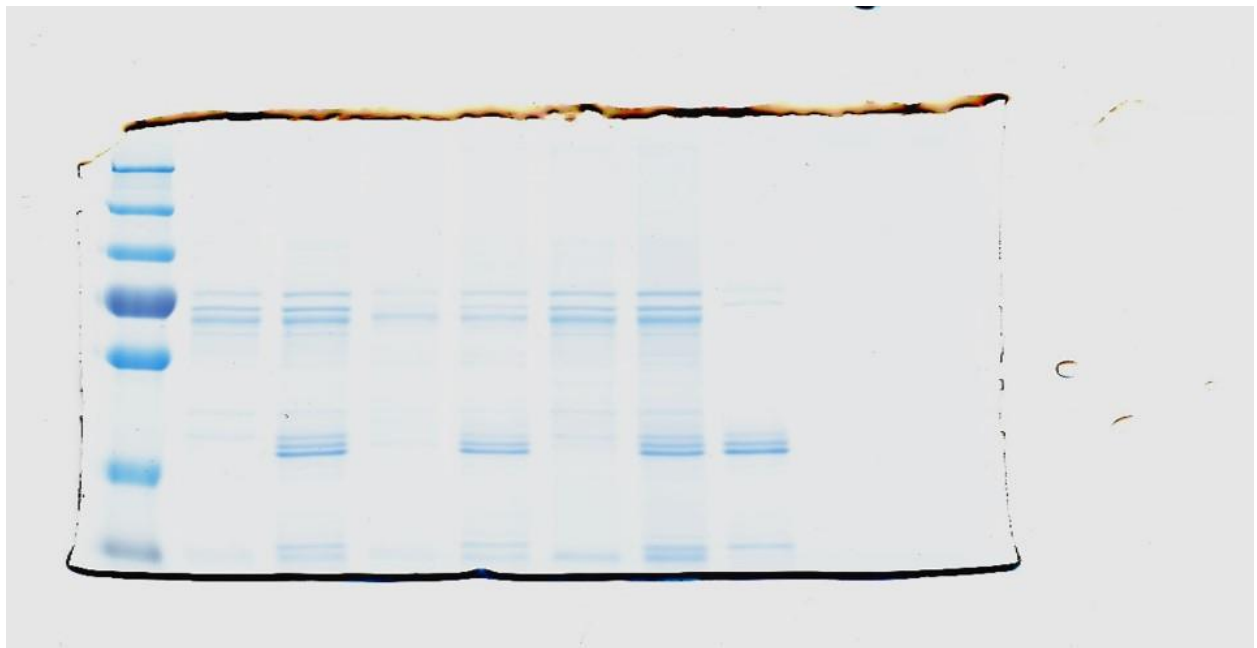

Source gel images for Fig 4G.
